# Supplementary material for: Topological Regulation of the Bioactive Conformation of a Disulfide-Rich Peptide, Heat-Stable Enterotoxin
Source: Molecules. 2020 Oct 21;25(20):4798. doi: 10.3390/molecules25204798 (PMC7587965; doi:10.3390/molecules25204798)
Supplement: Supplementary file 1 [file molecules-25-04798-s001.pdf]

Supplementary Materials

**Table S1.** Data collection and refinement statistics.

| <i>No. of restraints</i>                                    | <b>Topological isomer</b> | <b>Acm<sub>2</sub>-precursor</b> |
|-------------------------------------------------------------|---------------------------|----------------------------------|
| All                                                         | 64                        | 144                              |
| NOE distance restraints                                     | 61                        | 142                              |
| Intraresidue                                                | 21                        | 91                               |
| Sequential                                                  | 26                        | 42                               |
| Medium range                                                | 7                         | 3                                |
| Long range                                                  | 7                         | 6                                |
| Disulfide bond                                              | 3                         | 2                                |
| <i>Deviations from idealized covalent geometry</i>          |                           |                                  |
| Bonds(Å)                                                    | 0.0074 ± 1.83e-4          | 0.0134 ± 3.53e-4                 |
| Angle(°)                                                    | 0.718 ± 3.16e-4           | 1.98 ± 2.97e-2                   |
| Impropers(°)                                                | 0.371 ± 8.76e-4           | 0.786 ± 1.07e-2                  |
| <i>Mean coordinate RMSD from mean structure<sup>a</sup></i> |                           |                                  |
| Backbone heavy atoms                                        | 0.01 ± 0.01 Å             | 0.41 ± 0.16 Å                    |
| All heavy atoms                                             | 0.29 ± 0.17 Å             | 1.41 ± 0.28 Å                    |

<sup>a</sup> Root mean square deviation (RMSD) was calculated using 10 possible structures.

**Table S2.** Hydrogen bonds in the backbone structure of the native form, topological isomer and Acm<sub>2</sub>-precursor peptide.

| <b>ST<sub>h</sub>(6–18)</b> | <b>Hydrogen bond</b>      |                              | <b>structure</b> |
|-----------------------------|---------------------------|------------------------------|------------------|
|                             | <b>donor <sup>a</sup></b> | <b>acceptor <sup>a</sup></b> |                  |
| Native form                 | Leu9(H <sub>N</sub> ) ↔   | Cys6(CO)                     | Type I β-turn    |
|                             | Cys10(H <sub>N</sub> ) ↔  | Cys7(CO)                     |                  |
|                             | Cys11(H <sub>N</sub> ) ↔  | Cys6(CO)                     |                  |
|                             | Cys15(H <sub>N</sub> ) ↔  | Asn12(CO)                    | Type I β-turn    |
|                             | Cys18(H <sub>N</sub> ) ↔  | Cys15(CO)                    | Type II β-turn   |
| Topological isomer          | Cys7(H <sub>N</sub> ) ↔   | Cys10(CO)                    | Type I β-turn    |
|                             | Cys11(H <sub>N</sub> ) ↔  | Gly17(CO)                    |                  |
|                             | Cys15(H <sub>N</sub> ) ↔  | Asn12(CO)                    |                  |
| Acm <sub>2</sub> -precursor | Cys7(H <sub>N</sub> ) ↔   | Cys10(CO)                    | γ-turn           |
|                             | Ala14(H <sub>N</sub> ) ↔  | Asn12(CO)                    |                  |

<sup>a</sup> The structural information about hydrogen bonds in the native form of ST<sub>h</sub>(6–18) were based on the X-ray structure of [Mpr<sup>5</sup>]-ST<sub>p</sub>(5–17). The residue numbers of ST<sub>p</sub>(5–17) were adjusted to those of ST<sub>h</sub>(6–18).

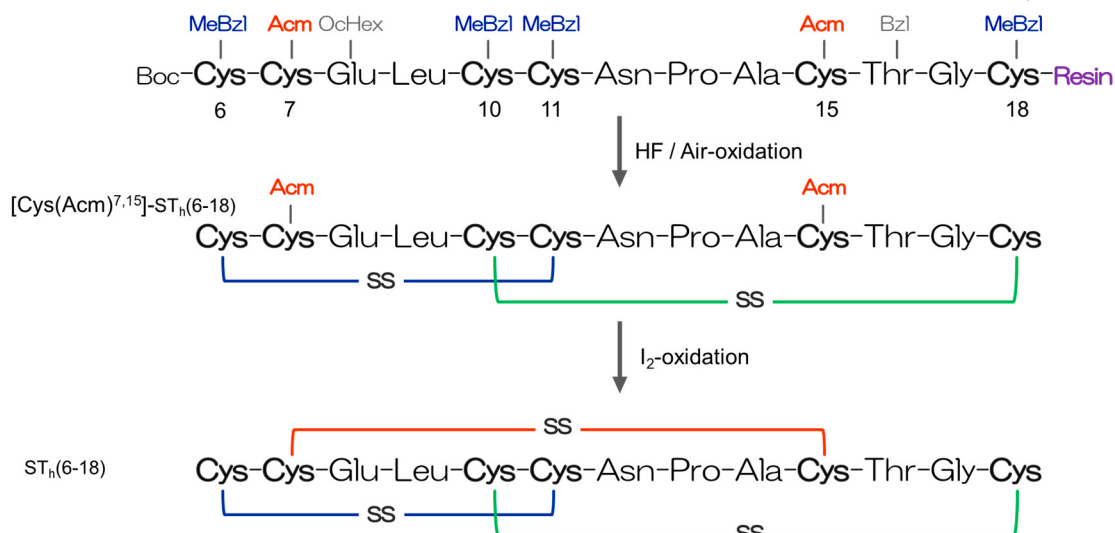

**Figure S1.** Scheme for synthesis of the topological isomer of ST<sub>h</sub>(6–18) by the stepwise formation of disulfide bonds.

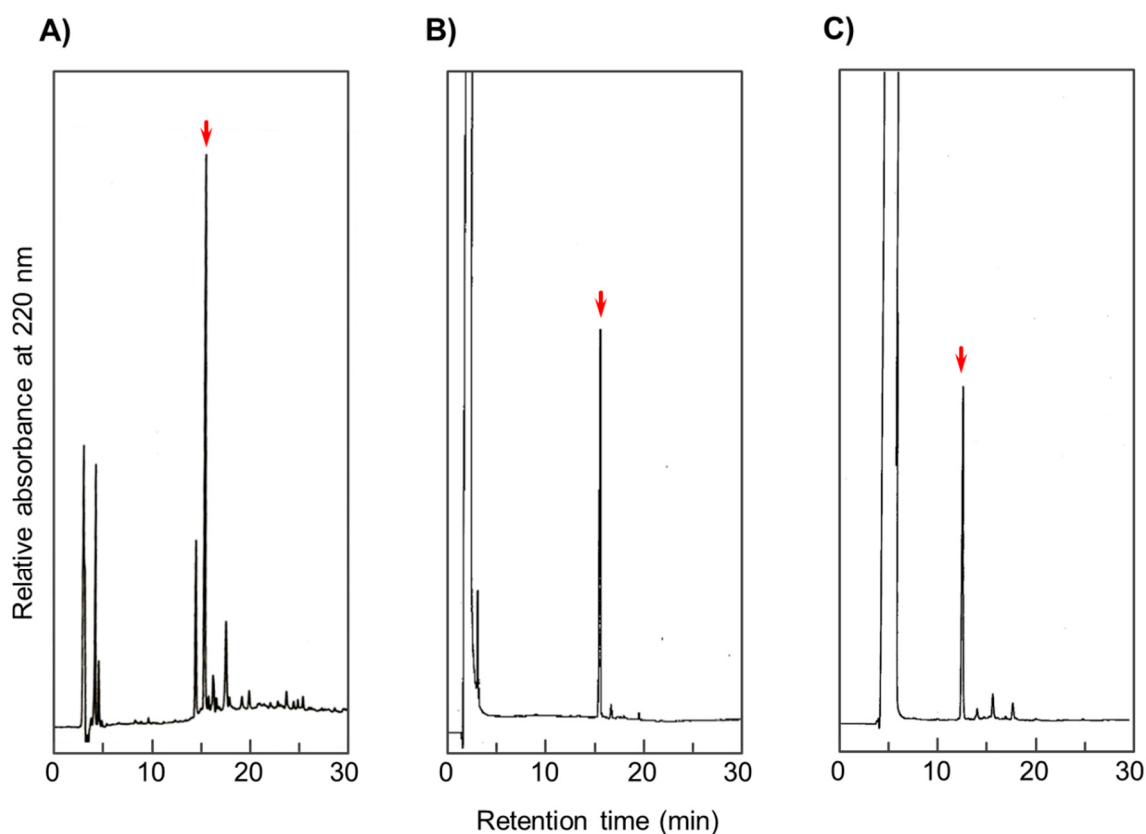

**Figure S2.** RP-HPLC profiles of the reaction solutions at each step of stepwise regioselective formation of disulfide bonds with linear gradient from 10 to 50% CH<sub>3</sub>CN in 40 min (1.0%/min). (A) After air-oxidation of the deprotected peptide in the first step, analytical HPLC of Acm<sub>2</sub>-peptides showed two major peaks. The arrow indicates the Acm<sub>2</sub>-precursor peptide used for following I<sub>2</sub>-oxidation. (B) Re-chromatogram of the peak fraction of Acm<sub>2</sub>-precursor peptide in Fig. S2A. (C) I<sub>2</sub>-oxidation under the ordinary condition using 50% MeOH produced the topological isomer.

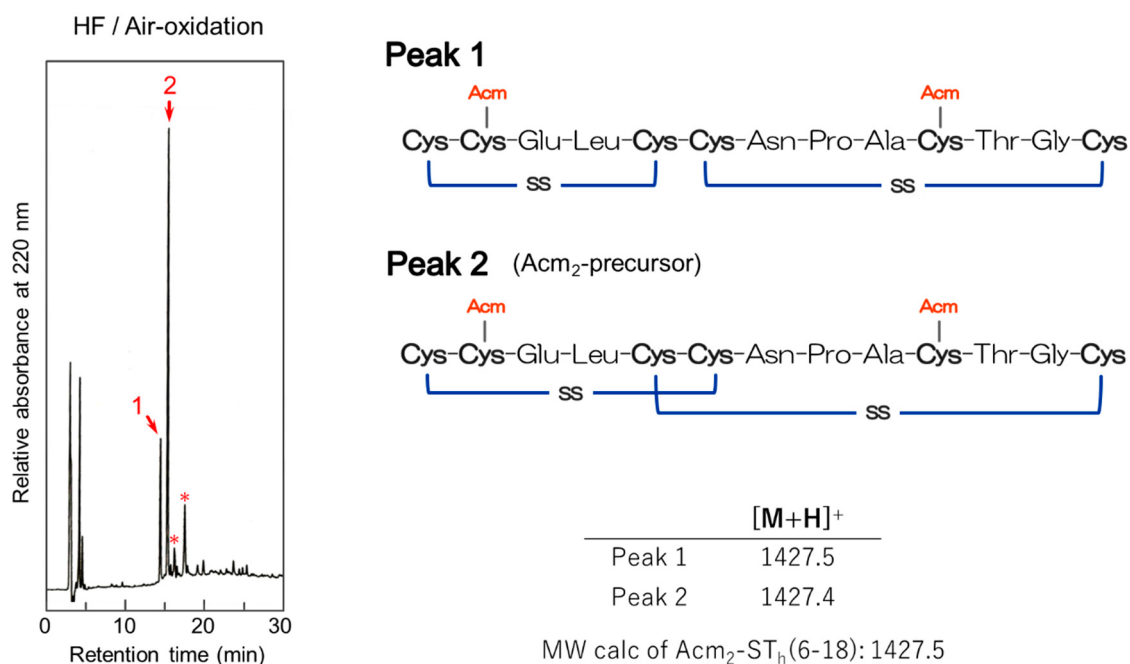

**Figure S3.** RP-HPLC profiles of the Acm<sub>2</sub>-precursor peptide after air-oxidation. The peak 1 indicates the fraction contained the Acm<sub>2</sub>-peptide with C1-C3 and C4-C6 connectivity. The peak 2 indicates the fraction containing the Acm<sub>2</sub>-precursor peptide. The asterisks indicate the impurities derived from the reagents used for the reaction (Shimonishi Y. et al., *FEBS Lett* **1987**, 215, (1), 165–70).

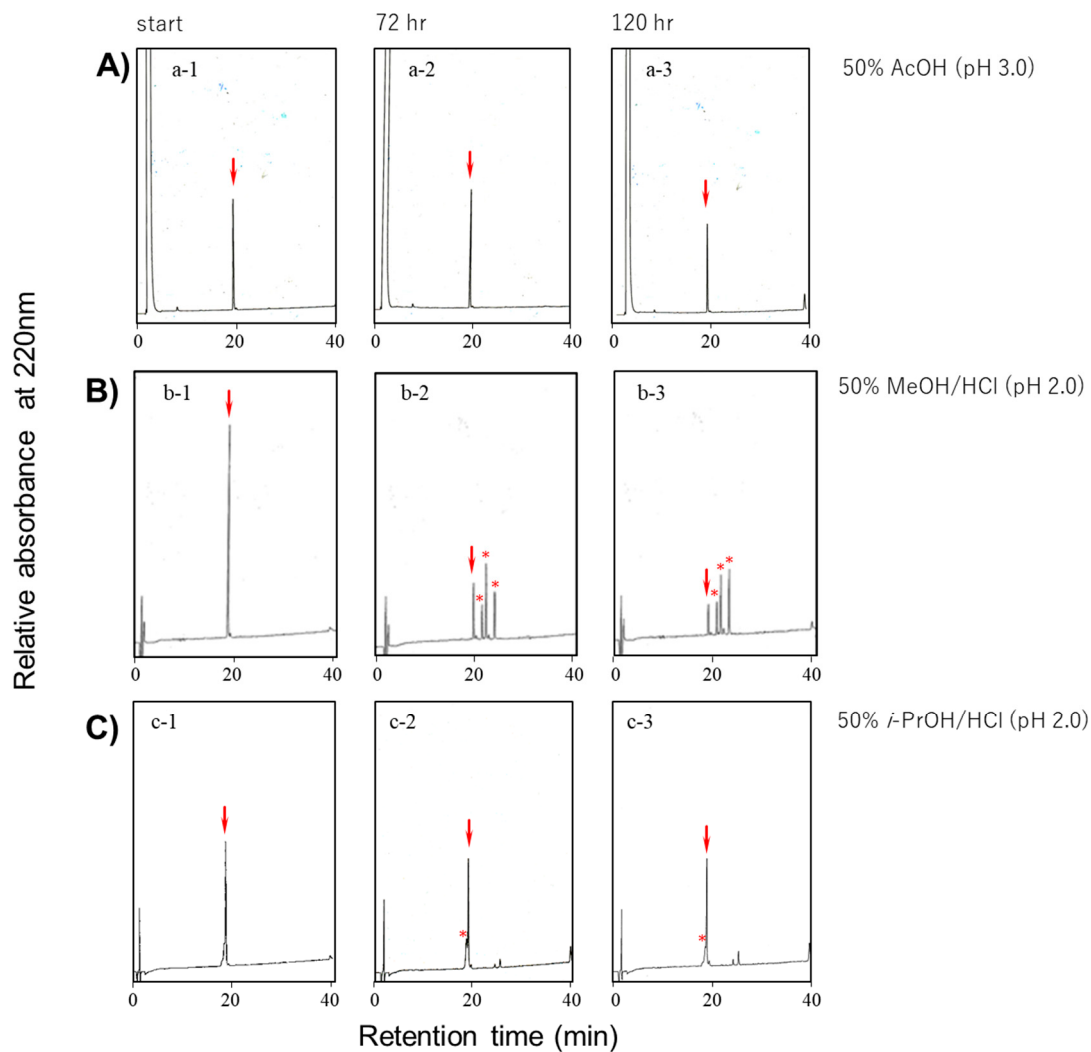

**Figure S4.** RP-HPLC profiles of Acm<sub>2</sub>-precursor peptide incubated in (A) 50% AcOH, (B) 50% MeOH/0.1 M HCl, and (C) 50% *i*-PrOH/0.1 M HCl at 25°C for 0, 72, and 120 hr, respectively.

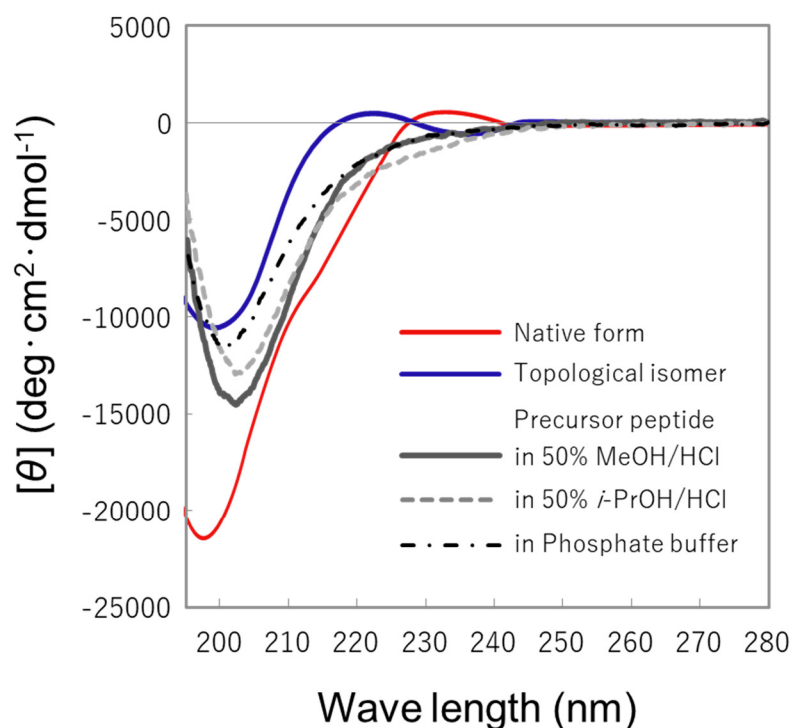

**Figure S5.** CD spectra of the native form (*solid red line*) and topological isomer (*solid blue line*) of ST<sub>h</sub>(6–18) in 20 mM sodium phosphate buffer (pH 6.5). CD spectra of Acm<sub>2</sub>-precursor peptide in 50% MeOH/0.1 M HCl (*solid line*), 50% *i*-PrOH/0.1 M HCl (*dashed line*), and 20 mM sodium phosphate buffer (pH 6.5) (*chain line*) at 25°C.

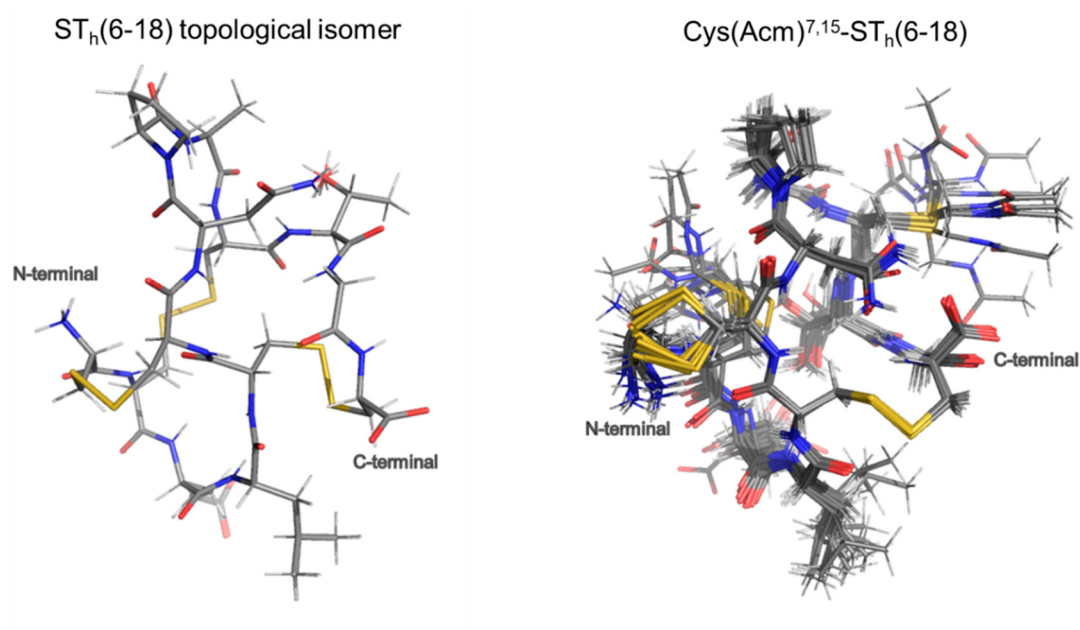

**Figure S6.** The superpositions of 10 lowest energy structures of (A) the topological isomer and (B) Acm<sub>2</sub>-precursor peptide of ST<sub>h</sub>(6–18).

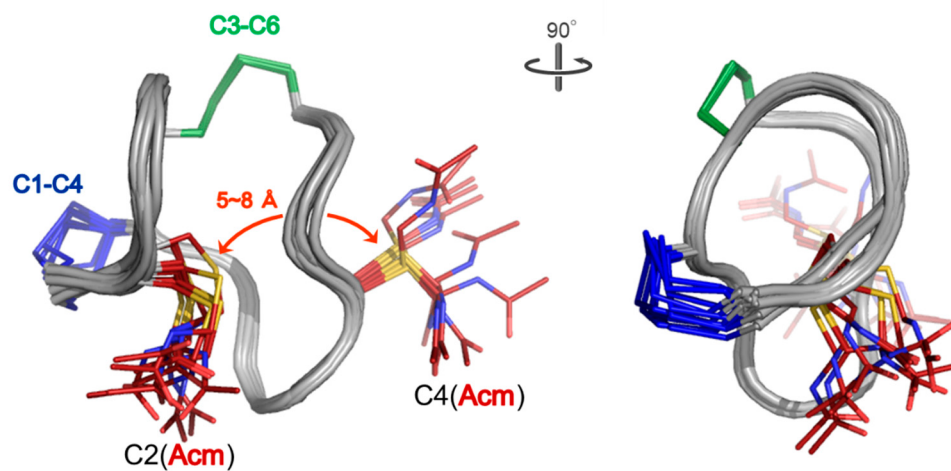

**Figure S7.** The superpositions of 10 lowest energy structures of Acm<sub>2</sub>-precursor peptide of ST<sub>h</sub>(6–18). The backbone structures were illustrated by cartoon representation, and the two disulfide bonds and two Cys(Acm) residues were illustrated by stick representation. The C1-C4, C3-C6 linkage, and two Cys(Acm) residues were colored by *blue*, *green* and *red*, respectively.
